# Supplementary material for: Modelling the Gastrointestinal Carriage of Klebsiella pneumoniae Infections
Source: PubMed Central journal article supplement (PMC9972987; doi:10.1128/mbio.03121-22), 2023-01-04
Supplement: mbio.03121-22-s0001.pdf [file mbio.03121-22-s0001.pdf]

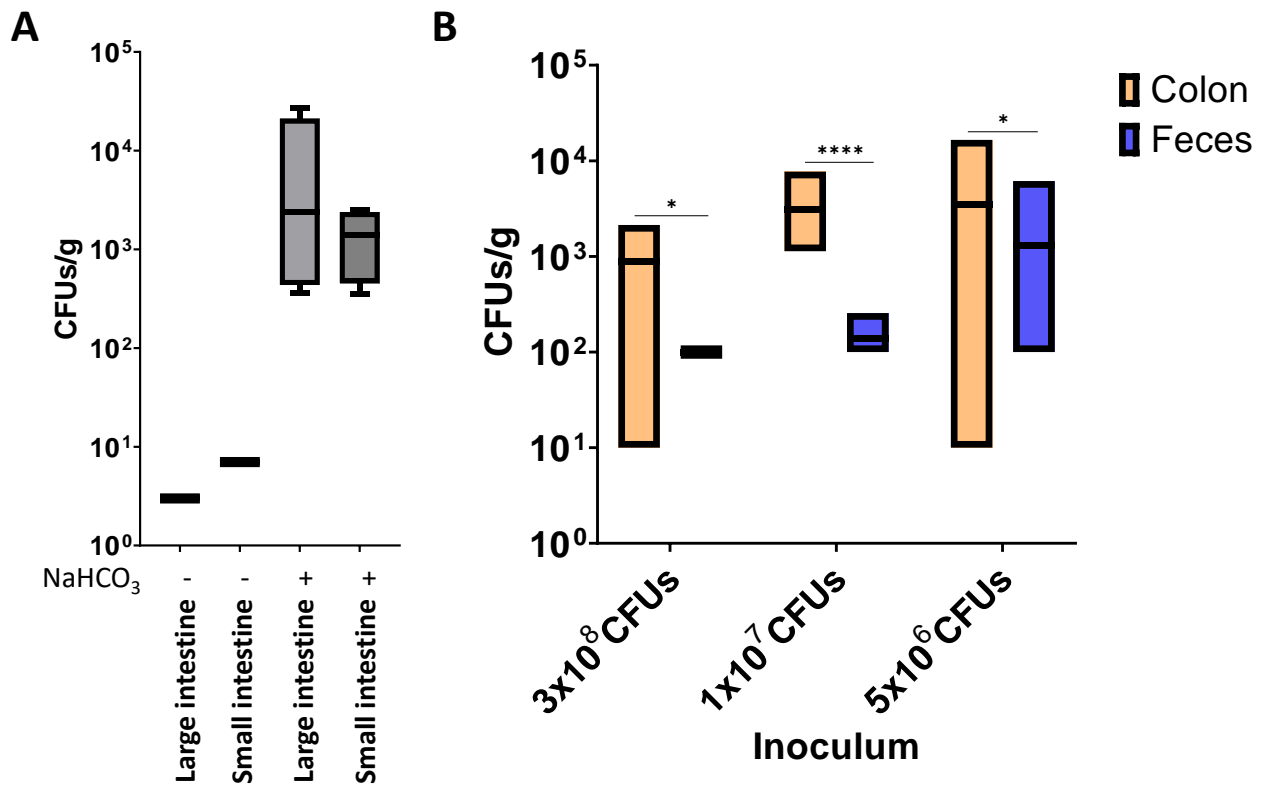

**Figure S1. Sodium bicarbonate treatment facilitates *K. pneumoniae* gut colonisation.**

**A.** CFUs per gr of small intestine and colon of mice infected with 10<sup>8</sup> CFUs of Kp52145. Mice were pre-treated or not with sodium bicarbonate 5 min before oral gavage of bacteria. 4-5 mice per group were infected. **B.** Bacterial loads in the colon and faeces of mice infected with the indicated bacterial doses. Samples were obtained twelve days post infection. 4-5 mice per group were analysed.

In panels, values are presented as the mean  $\pm$  SD. \*\*\*\* $P \leq 0.0001$ ; \* $P \leq 0.05$  for the indicated comparisons determined using Mann-Whitney U test.
