# Supplementary material for: Modelling the Gastrointestinal Carriage of Klebsiella pneumoniae Infections
Source: PubMed Central journal article supplement (PMC9972987; doi:10.1128/mbio.03121-22), 2023-01-04
Supplement: mbio.03121-22-s0002.pdf [file mbio.03121-22-s0002.pdf]

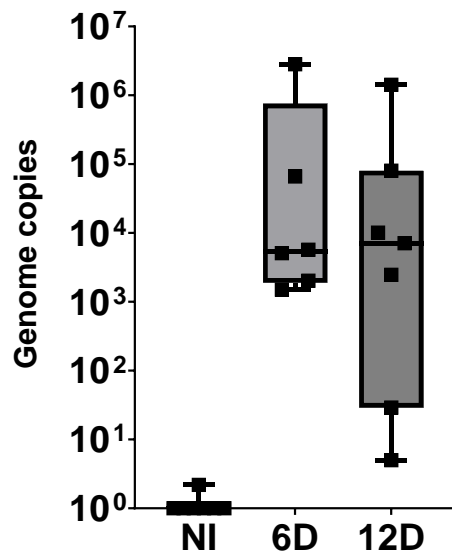

**Figure S2. Detection of *K. pneumoniae* by ZKIR-qPCR in colon samples.**

*K. pneumoniae* was detected in the colon samples of non-infected (NI) mice infected and of infected mice at six (6D) and twelve (12D) days post infections by the ZKIR-qPCR method. 6-7 mice were analysed in each group.
