# Supplementary material for: Modelling the Gastrointestinal Carriage of Klebsiella pneumoniae Infections
Source: PubMed Central journal article supplement (PMC9972987; doi:10.1128/mbio.03121-22), 2023-01-04
Supplement: mbio.03121-22-s0003.pdf [file mbio.03121-22-s0003.pdf]

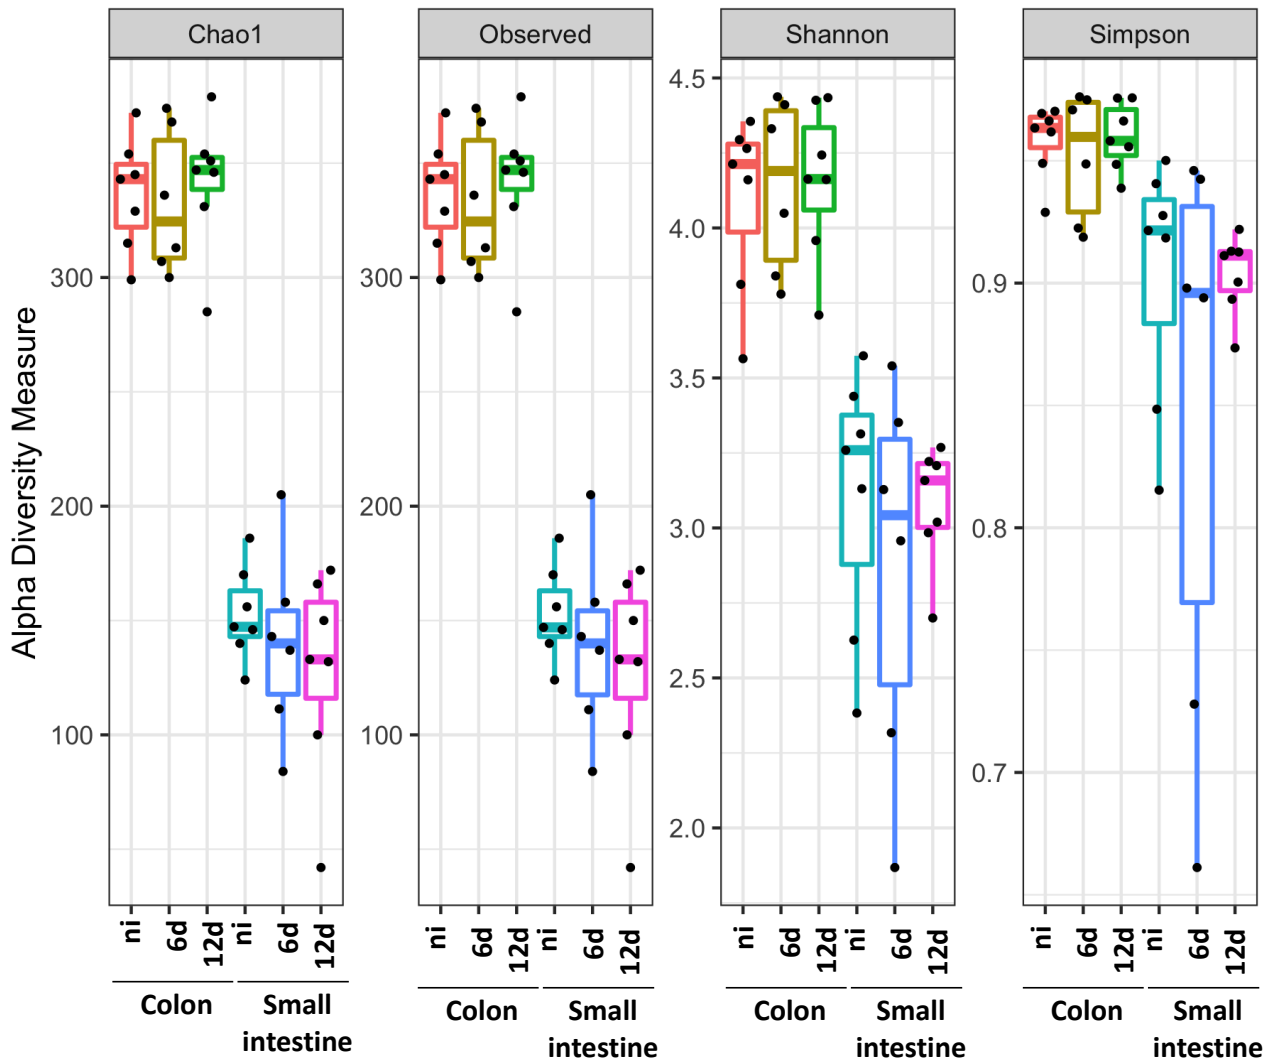

**Figure S3. *K. pneumoniae* gut colonisation does not affect the richness of the microbiome.**

Diversities of the faecal microbiota of non-infected (ni) mice and of infected mice at six (6d) and twelve (12d) days post infections were summarized by four indexes. 6-7 mice were analysed in each group. No statistical differences were found.
