# Supplementary material for: Modelling the Gastrointestinal Carriage of Klebsiella pneumoniae Infections
Source: PubMed Central journal article supplement (PMC9972987; doi:10.1128/mbio.03121-22), 2023-01-04
Supplement: mbio.03121-22-s0004.pdf [file mbio.03121-22-s0004.pdf]

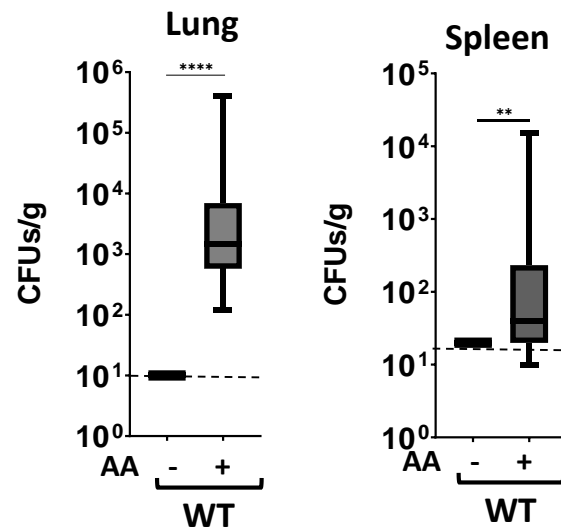

**Figure S4. *K. pneumoniae* disseminates from the gut to other tissues in mice pre-treated with antibiotic cocktail.**

CFUs per gr of lung and spleen of mice infected with Kp52145 which were pre-treated or not with the antibiotic cocktail (AA). 10-16 mice were included in each group in two independent experiments.

Dashed lines indicate the limit of detection. In all panels, values are presented as the mean  $\pm$  SD. \*\*\*\* $P \leq 0.0001$ ; \*\*  $P \leq 0.01$  for the indicated comparisons determined using Mann-Whitney U test.
