# Supplementary material for: Modelling the Gastrointestinal Carriage of Klebsiella pneumoniae Infections
Source: PubMed Central journal article supplement (PMC9972987; doi:10.1128/mbio.03121-22), 2023-01-04
Supplement: mbio.03121-22-s0005.pdf [file mbio.03121-22-s0005.pdf]

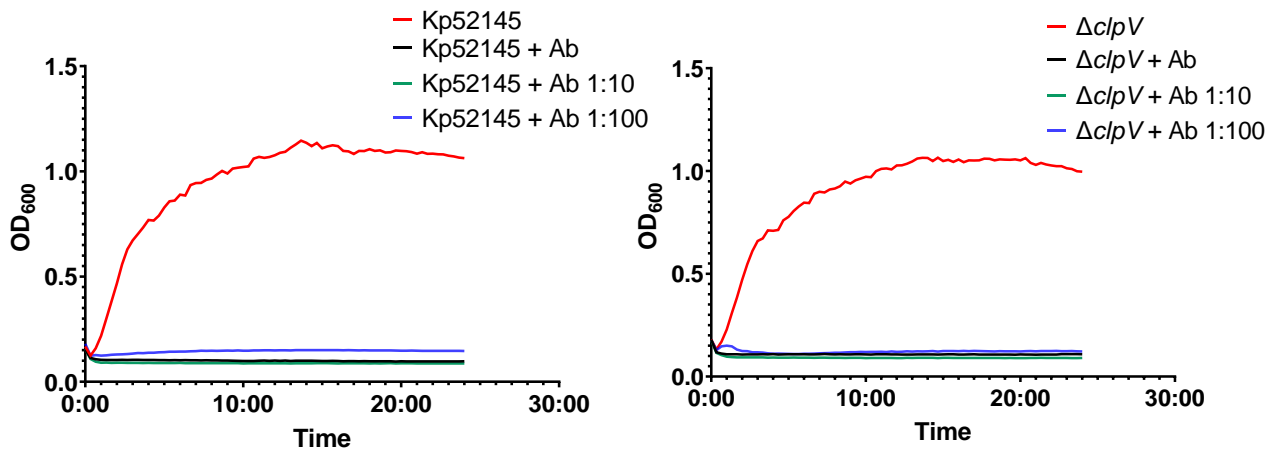

**Figure S5. Effect of the antibiotic cocktail on the growth of *K. pneumoniae* strains.**

The growth of Kp52145 and type VI secretion system mutant strain, 52145- $\Delta clpV$  ( $\Delta clpV$ ), in LB without any antibiotic or with the antibiotic cocktail (ampicillin 1 g/l, neomycin sulfate 1 g/l, metronidazole 1 g/l, and vancomycin 0.5 g/l) tested also ten (1:10) and one hundred (1:100) times diluted was determined.

For these experiments, 5  $\mu$ l of overnight cultures were diluted in 250  $\mu$ l of LB and incubated at 37°C with continuous, normal shaking in a Bioscreen C Automated Microbial Growth Analyzer (MTX Lab Systems, Vienna, VA, USA). Optical density (OD; 600 nm) was measured and recorded every 20 min.
