# Supplementary material for: Modelling the Gastrointestinal Carriage of Klebsiella pneumoniae Infections
Source: PubMed Central journal article supplement (PMC9972987; doi:10.1128/mbio.03121-22), 2023-01-04
Supplement: mbio.03121-22-s0006.pdf [file mbio.03121-22-s0006.pdf]

**Table S1. Histopathology scoring for murine intestine.**

| <b>Score</b> | <b>Infiltration of inflammatory cells</b>   | <b>Submucosal edema</b> | <b>Epithelial damage</b>                                                                                                                                                                                                                                      | <b>Exudate</b>        |
|--------------|---------------------------------------------|-------------------------|---------------------------------------------------------------------------------------------------------------------------------------------------------------------------------------------------------------------------------------------------------------|-----------------------|
| 3            | Severe multifocal to diffuse infiltration   | Severe (>40%)           | Multifocal to diffuse ulceration and/or severe multifocal to diffuse enterocyte hyperplasia with metaplasia [colon]<br><br>Severe multifocal to diffuse villus blunting associated with multifocal to diffuse ulceration and/or haemorrhage [small intestine] | Severe accumulation   |
| 2            | Moderate multifocal to diffuse infiltration | Moderate (20-40%)       | Moderate multifocal to diffuse loss of goblet cells associated with enterocyte hyperplasia [colon]<br><br>Moderate multifocal villus blunting associated with mild to moderate epithelial erosion [small intestine]                                           | Moderate accumulation |
| 1            | Mild multifocal to diffuse infiltration     | Mild (1-20%)            | Erosion/mild loss of goblet cells and enterocyte hyperplasia [colon]<br><br>Mild multifocal villus blunting [small intestine]                                                                                                                                 | Mild accumulation     |
| 0            | No infiltration                             | Not present             | Not present                                                                                                                                                                                                                                                   | Not present           |
