# Supplementary material for: Modelling the Gastrointestinal Carriage of Klebsiella pneumoniae Infections
Source: PubMed Central journal article supplement (PMC9972987; doi:10.1128/mbio.03121-22), 2023-01-04
Supplement: mbio.03121-22-s0007.pdf [file mbio.03121-22-s0007.pdf]

**Table S2. Primers used in this study.**

| <b>Name</b>                                      | <b>Sequence (5'-3')</b>                   |
|--------------------------------------------------|-------------------------------------------|
| <b>qPCR</b>                                      |                                           |
| m_Cxcl1_F1                                       | TGC ACC CAA ACC GAA GTC ATA G             |
| m_Cxcl1_R1                                       | TTG TAT AGT GTT GTC AGA AGC CAG C         |
| mHPRT-F1                                         | GAT CAG TCA ACG GGG GAC AT                |
| mHPRT-R1                                         | GGT CCT TTT CAC CAG CAA GC                |
| mReg3g_for                                       | ATG GCT CCT ATT GCT ATG CC                |
| mReg3g_rev                                       | GAT GTC CTG AGG GCC TCT T                 |
| Reg4F_qPCR                                       | CGC TGA GAT GAA CCC CAA G                 |
| Reg4R_qPCR                                       | TGA GAG GGA AGT GGG AAG AG                |
| S100a8F_qPCR                                     | AGT GTC CTC AGT TTG TGC AG                |
| S100a8R_qPCR                                     | ACT CCT TGT GGC TGT CTT TG                |
| m_Tnf_F1                                         | GAT CGG TCC CCA AAG GGA TG                |
| m_Tnf_R1                                         | CAC TTG GTG GTT TGC TAC GAC               |
| <b>Construct <i>K. oxytoca clpV</i> mutant</b>   |                                           |
| pKNOCK-Koxy-clpV-F3                              | TAGAACTAGTggatcc ATGAGTGGGATATGGAGATTC    |
| pKNOCK-Koxy-clpV-R3                              | GCAGCCCGGGggatcc ATCTACCGCCTTGTCAGG       |
| <b>Check <i>K. oxytoca clpV</i></b>              |                                           |
| pKNOCK-Koxy-clpV-sc-F                            | CGAGATTACTATTGAGCACTGG                    |
| pKNOCK-Koxy-clpV-sc-R                            | GGCTCAGTACAGGCAGAATC                      |
| <b>Construct <i>K. variicola clpV</i> mutant</b> |                                           |
| 6144-clpV.1                                      | CCAGACTCCGGTTATCATGC                      |
| 6144-clpV.2                                      | ATTTGCCTAAGCCATTCAACG                     |
| 6144-clpV.3                                      | ggaataggaactaaggaggaCAAACCTCCAATCATGAAGC  |
| 6144-clpV.4                                      | cctacacaatcgctcaagacCTGGGTGGTCTGCGTTTAAAC |

6144-clpV.5 CGAAAACCTCTCCACCACC

6144-clpV.6 GCGCGCTGTGTCATTATCC

cm.3a TCCTCCTTAGTTCCTATTCC

cm.4a GTCTTGAGCGATTGTGTAGG

**ZIKIR primers**

ZKIR\_F CTAAAACCGCCATGTCCGATTTAA

ZKIR\_R TTCCGAAAATGAGACACTTCAGA

---
